# Supplementary material
Source: PubMed Central journal article supplement (PMC10962863)
Supplement: NIHMS1965195-supplement-supplemental_info.pdf [file NIHMS1965195-supplement-supplemental_info.pdf]

# Manual

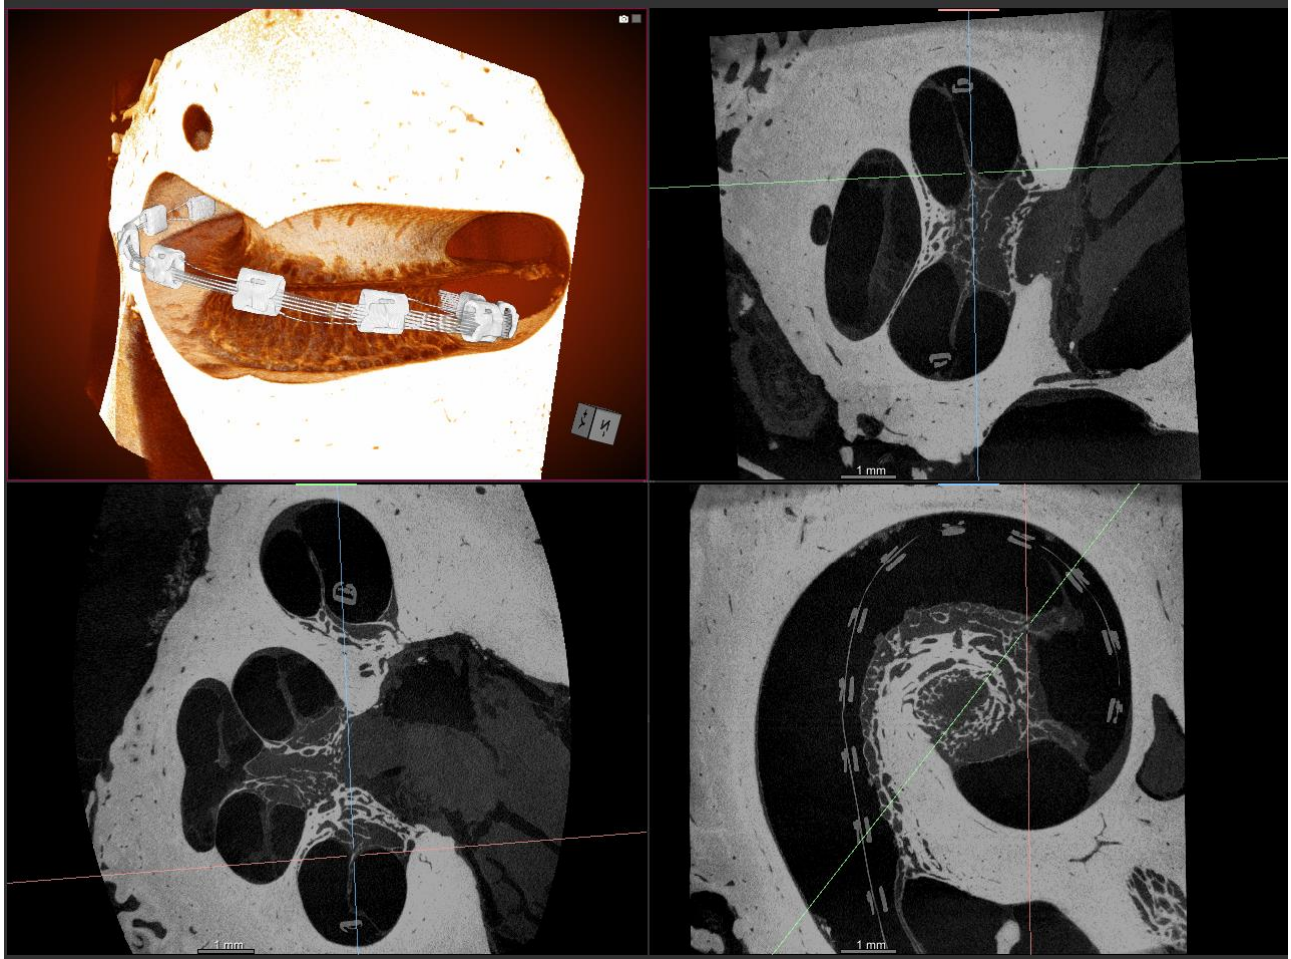

Scala media translocation

# Manual

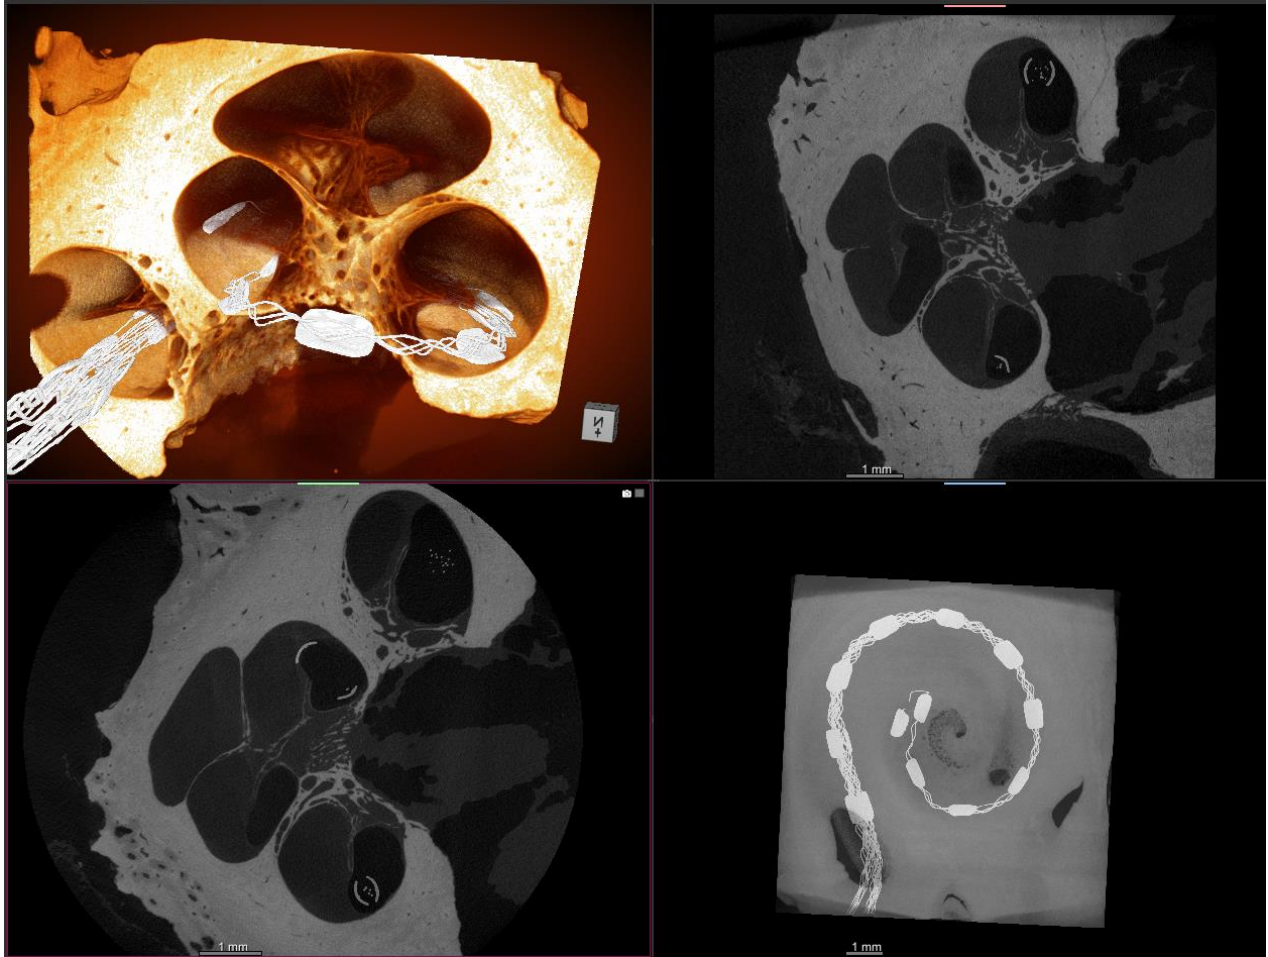

**Scala tympani insertion and tip fold over**

# Manual

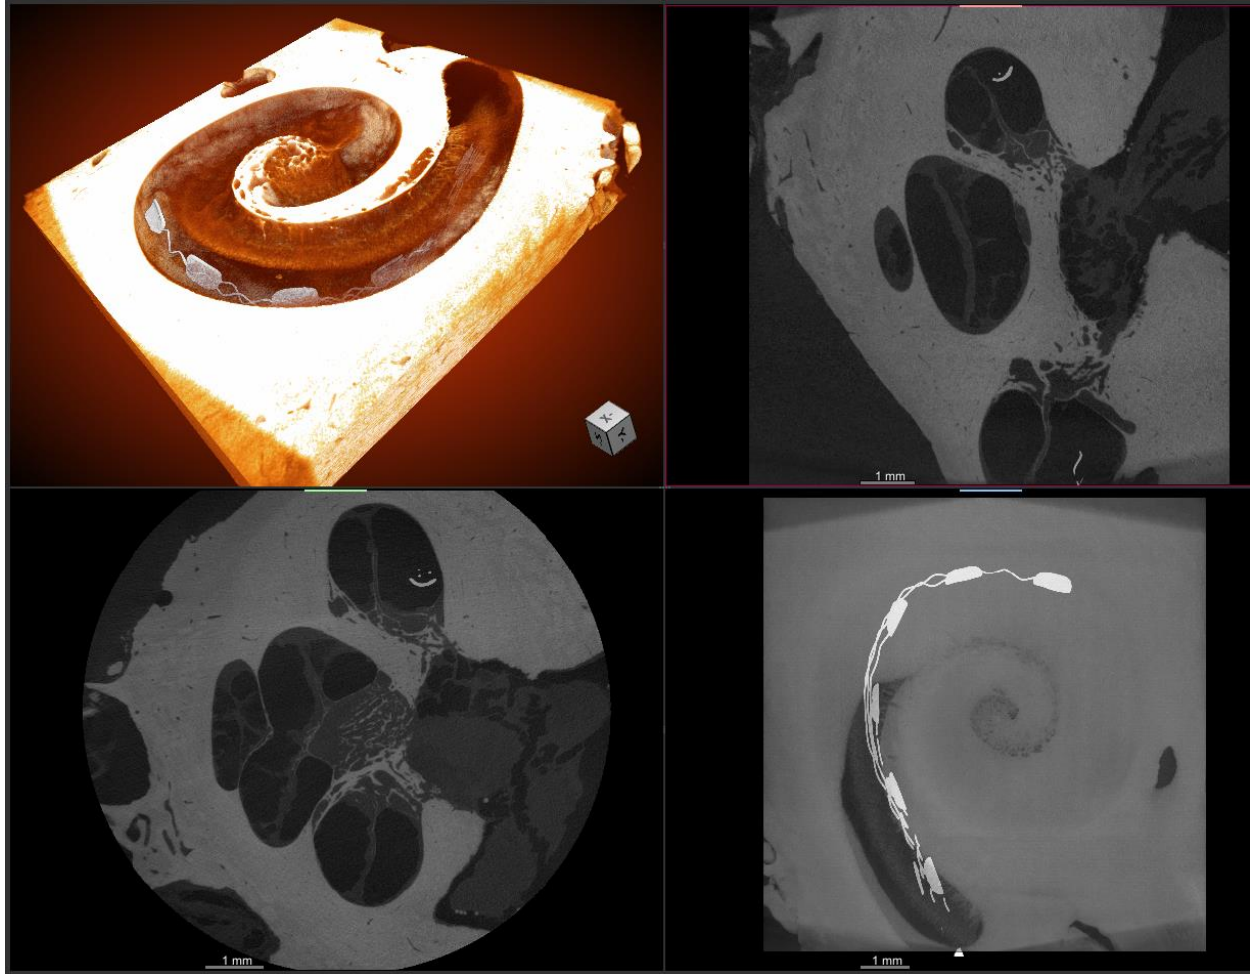

**Scala tympani insertion**

# Manual

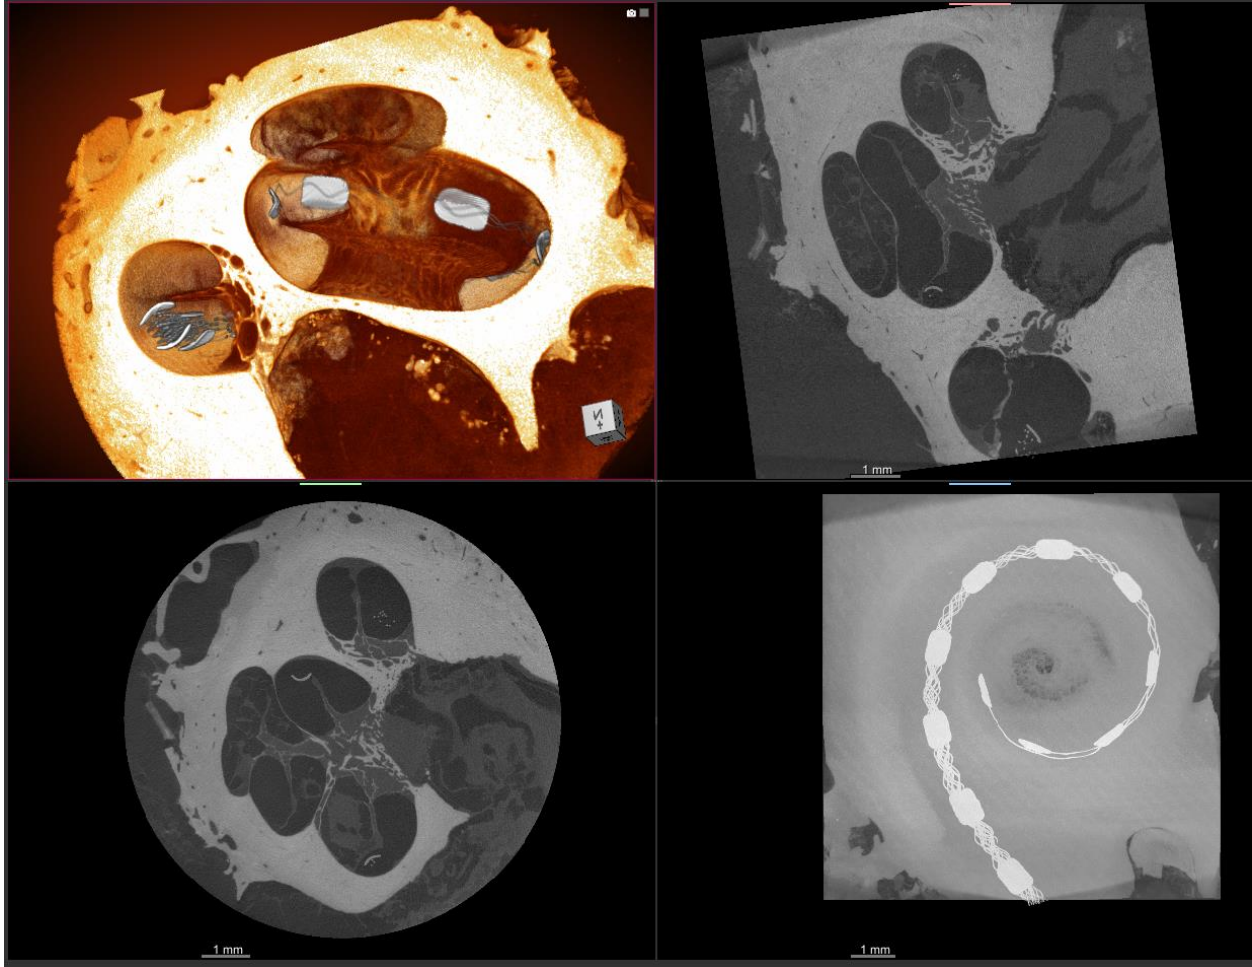

**Scala vestibuli translocation**

# Manual

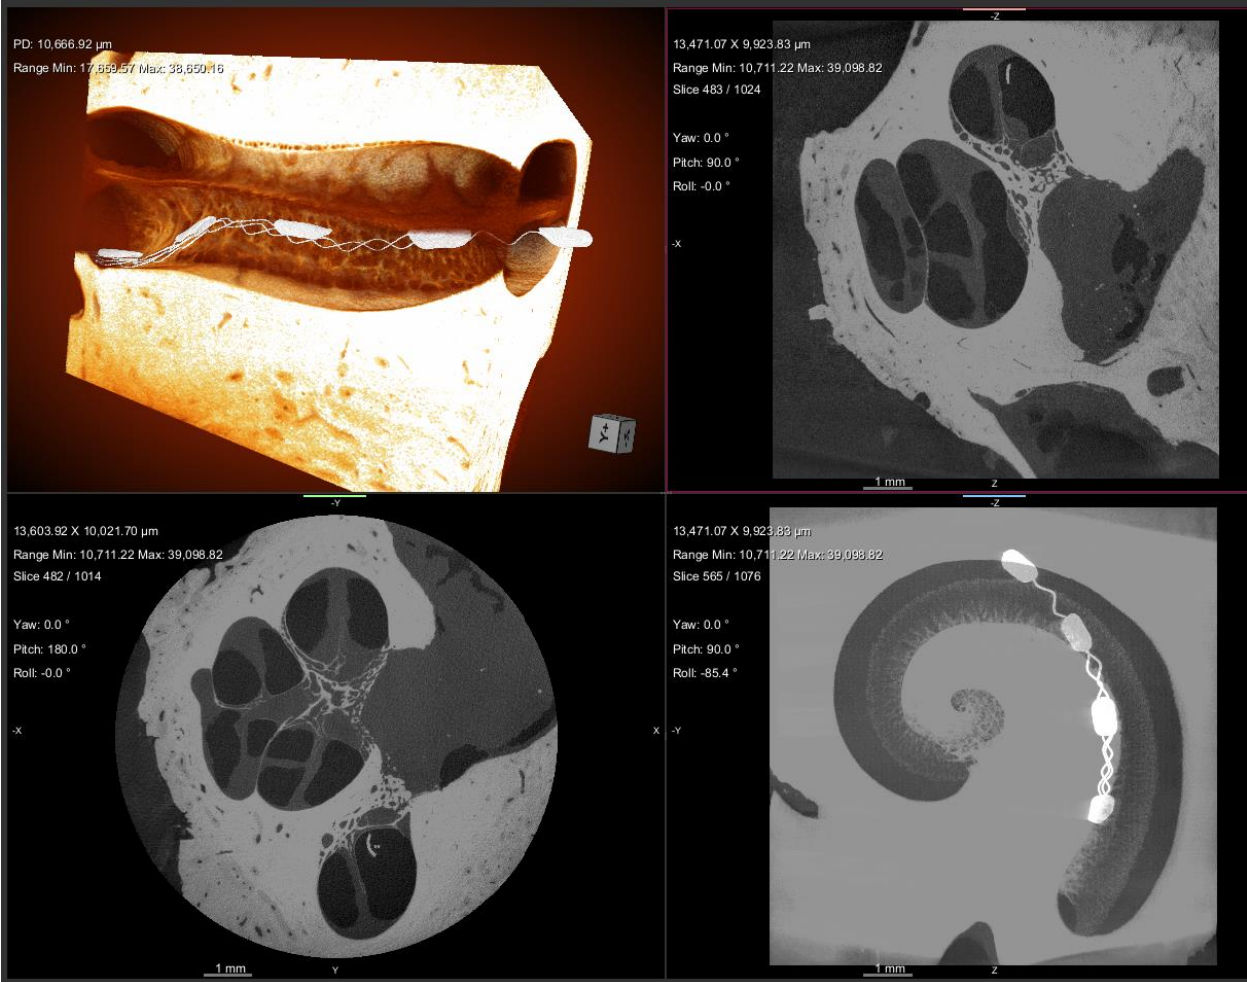

Scala tympani insertion

# Manual

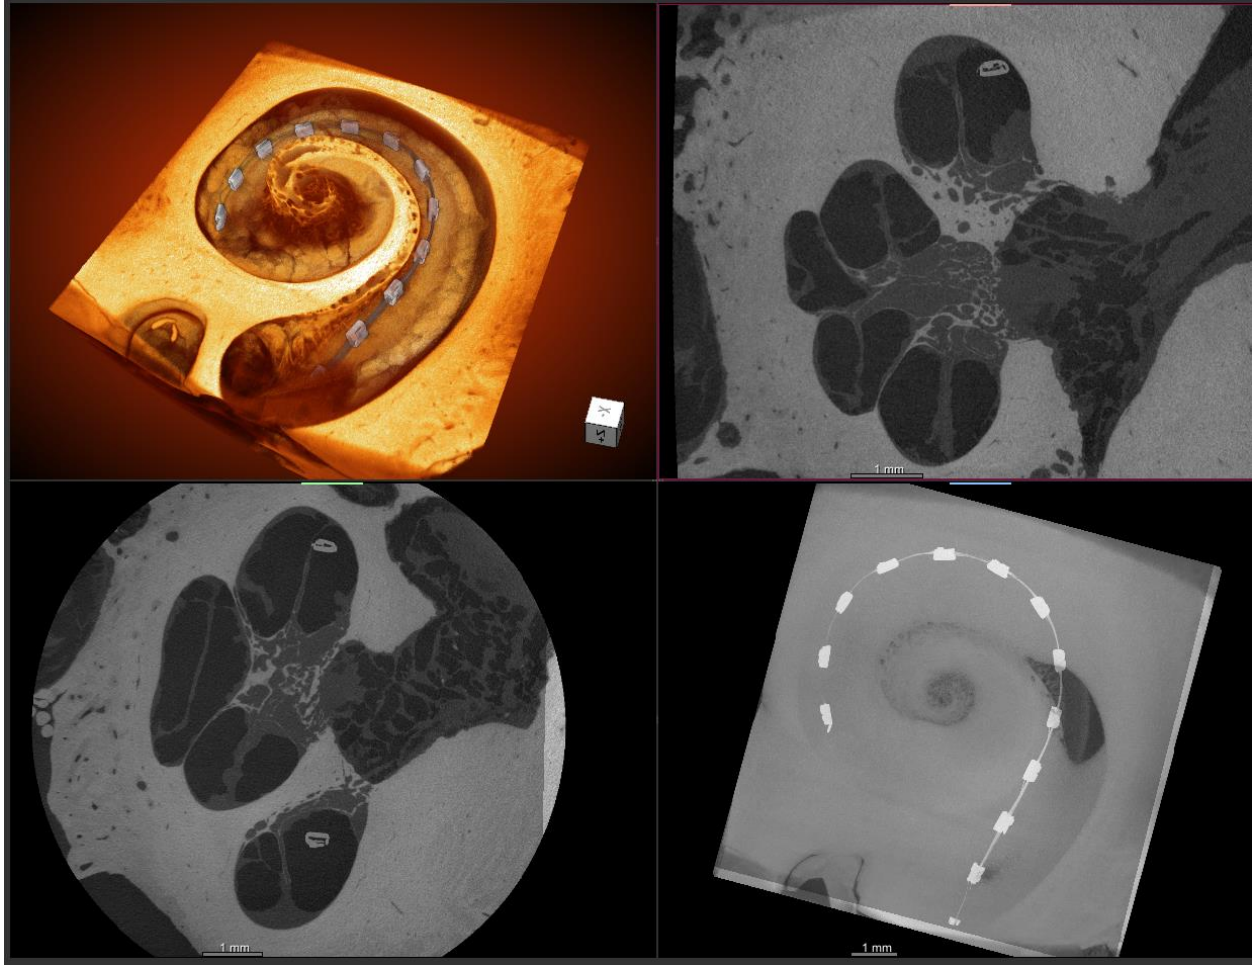

**Scala tympani insertion with OSL fracture**

# Manual

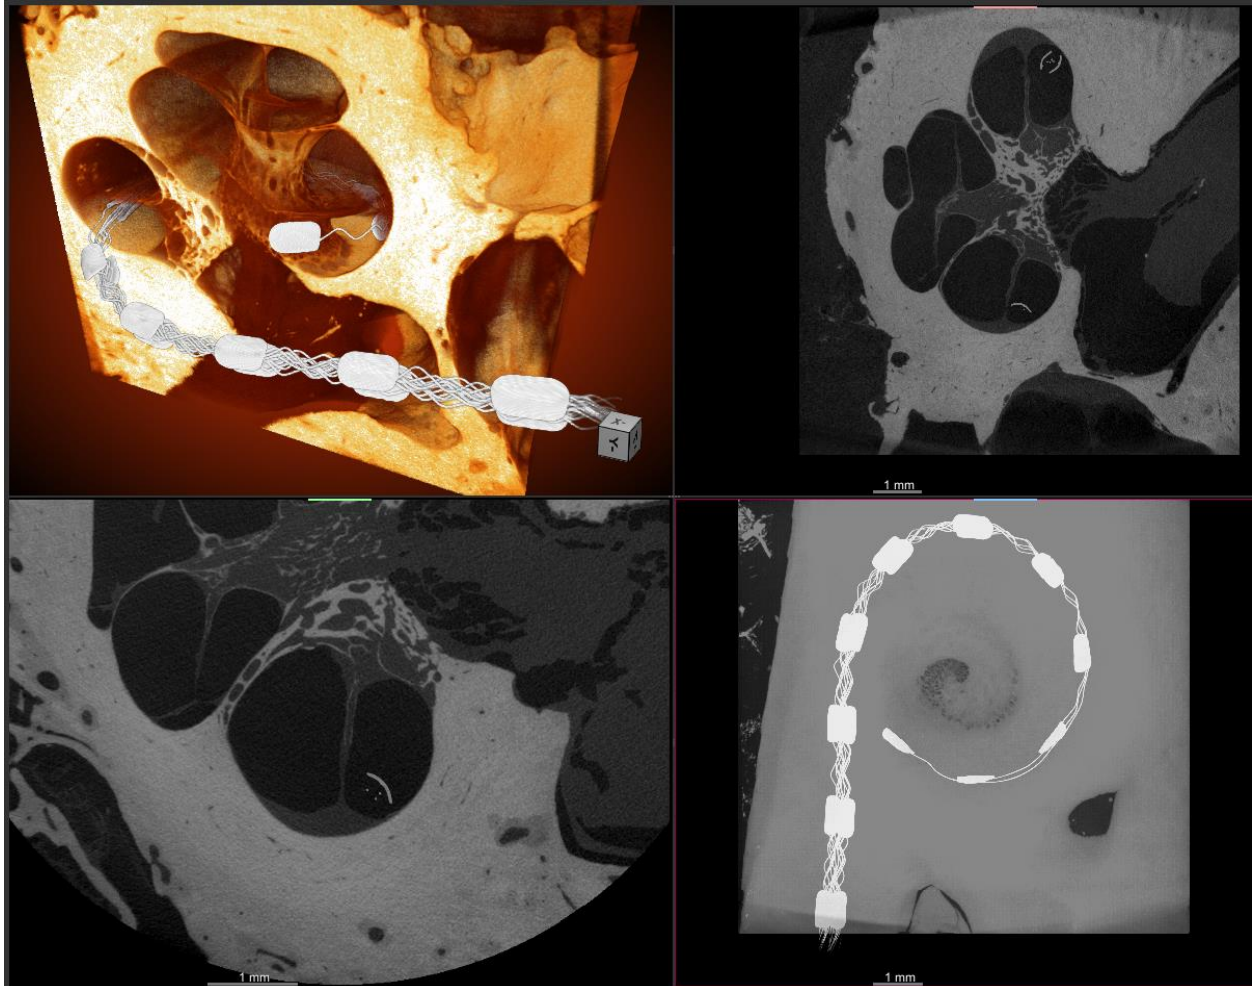

**Scala tympani insertion**

# Manual

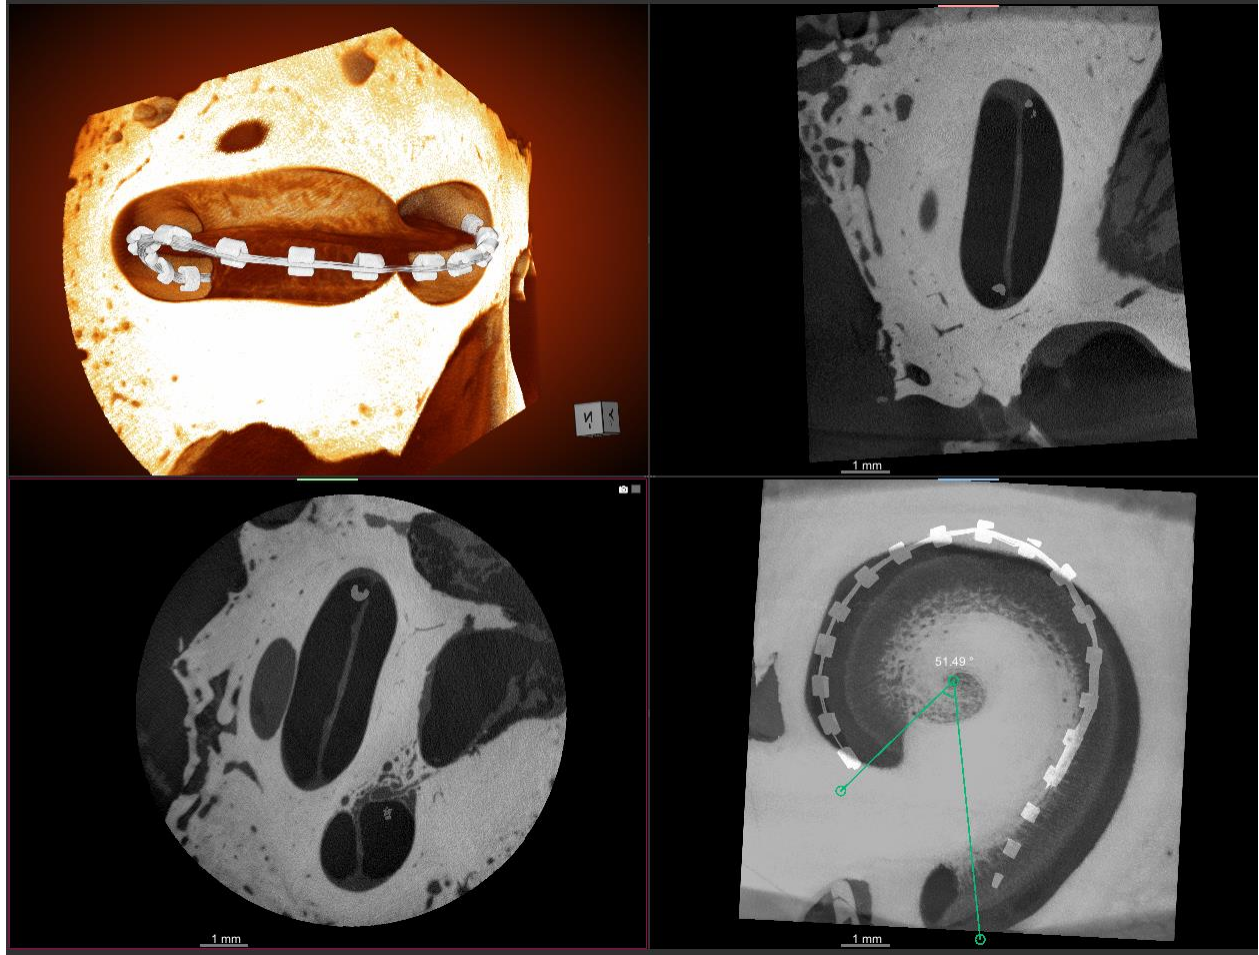

**Scala media translocation**



# Manual

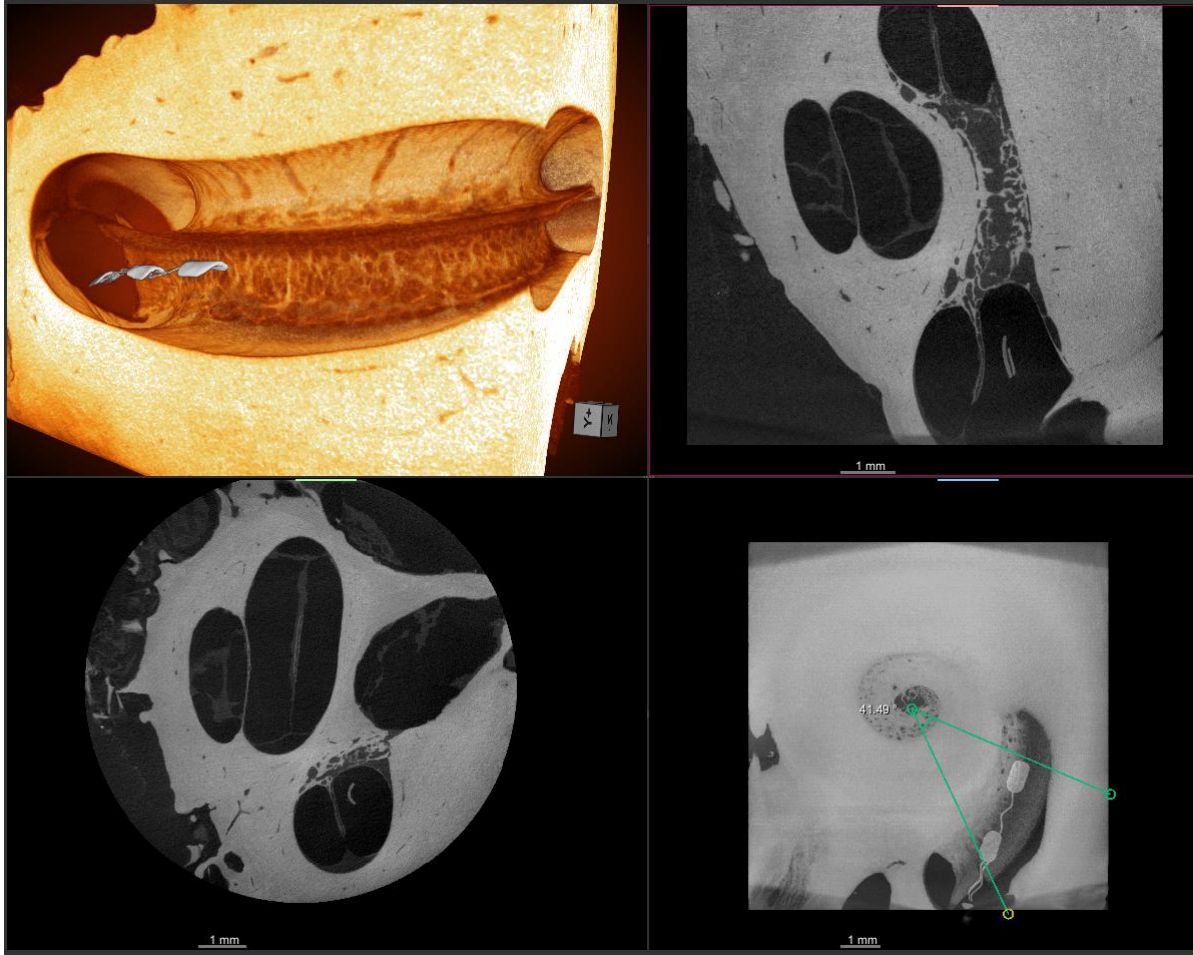

**Scala tympani insertion with OSL fracture**

# Manual

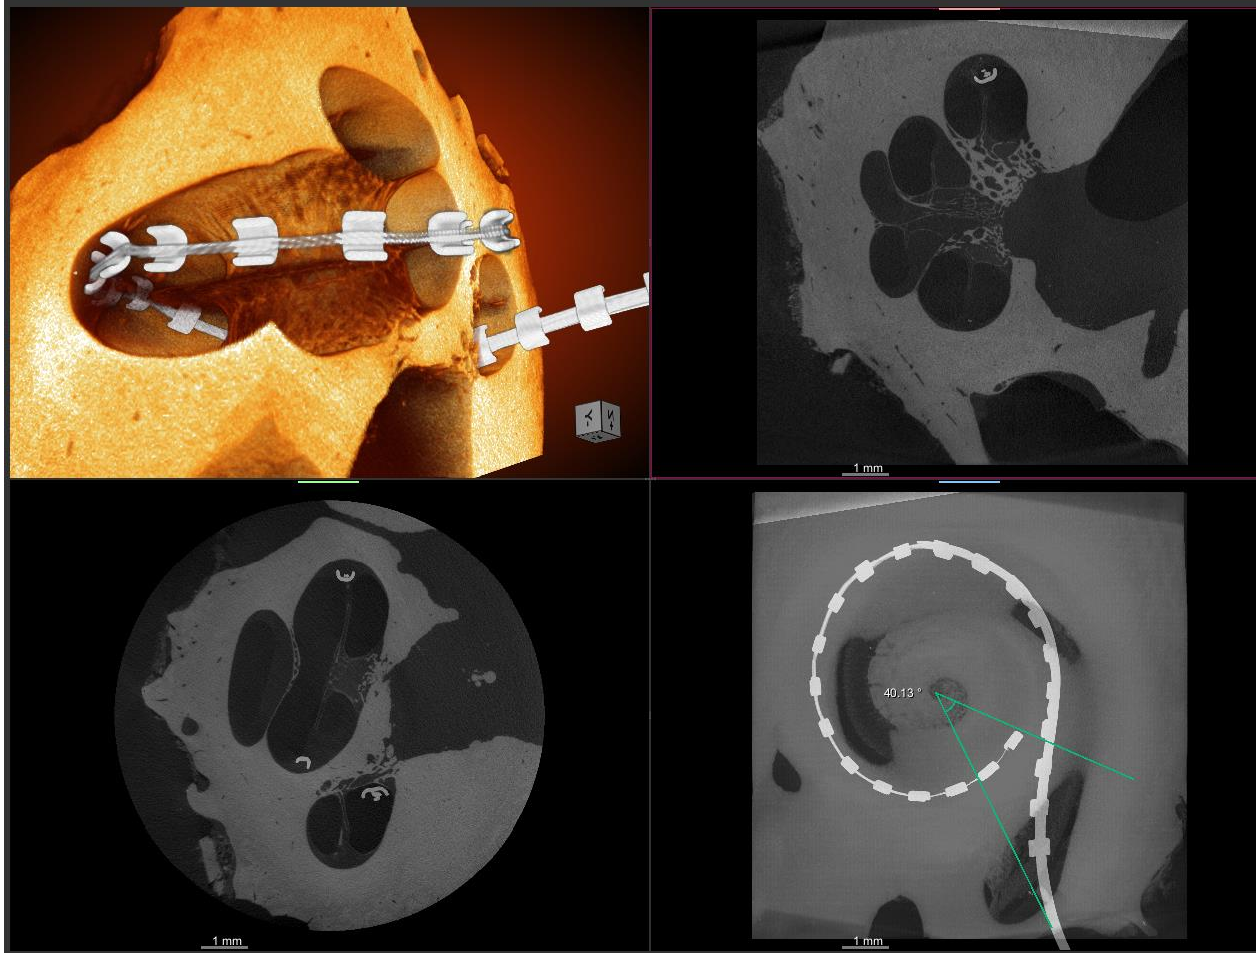

**Scala media translocation with OSL fracture**

# Manual

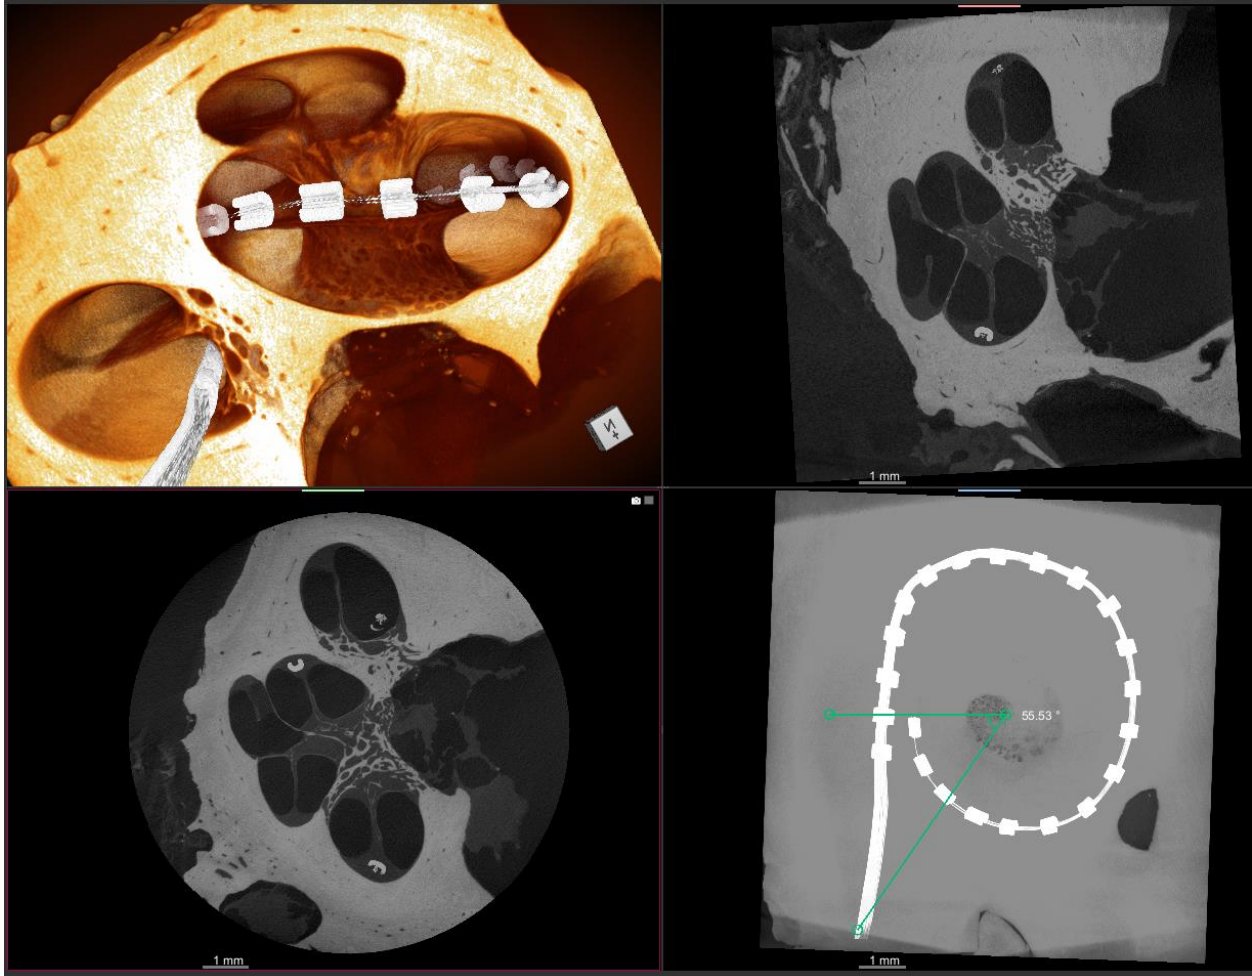

**Scala media translocation**

# Robotics-Assisted

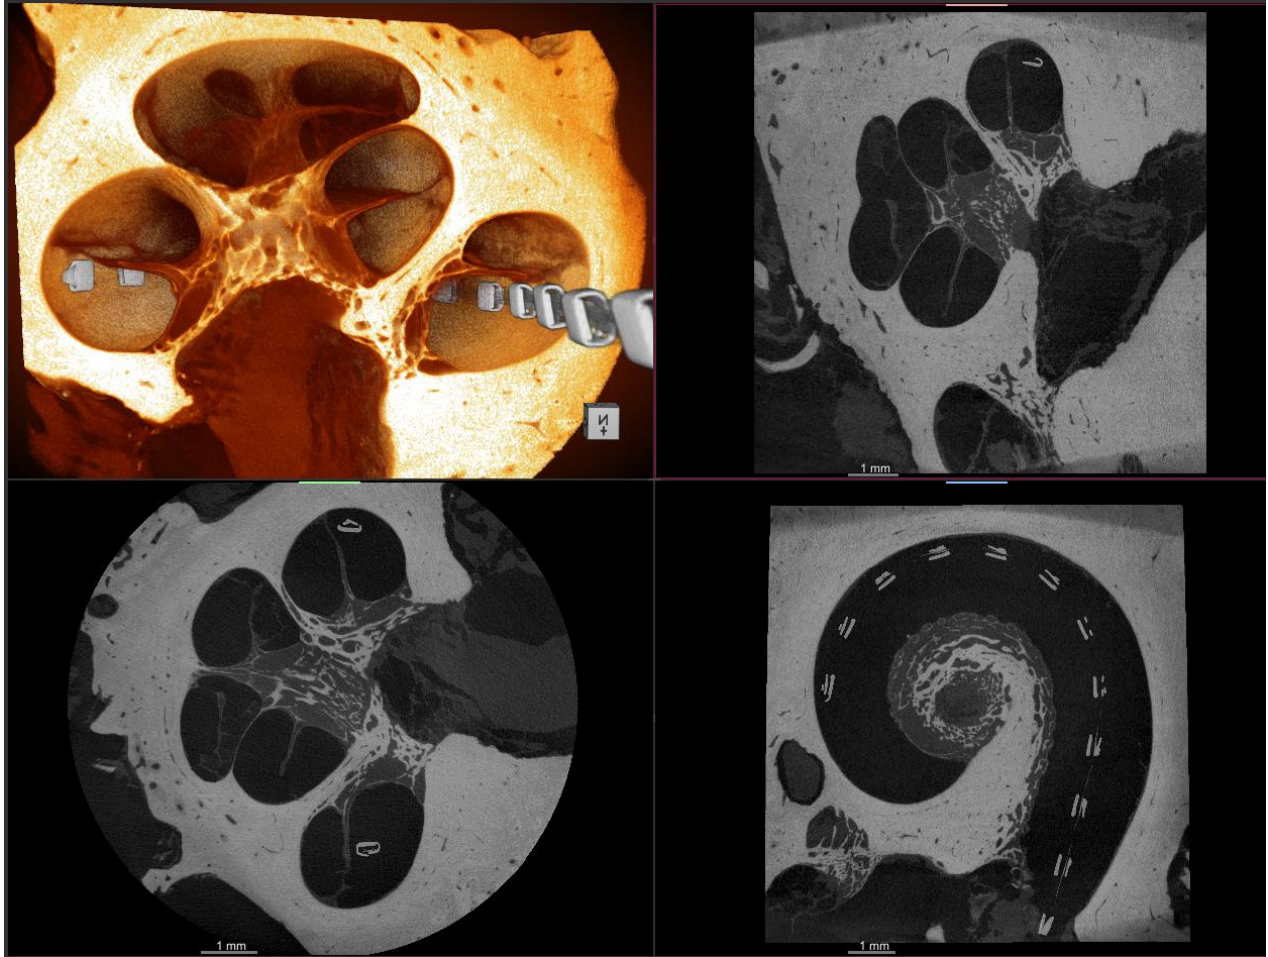

Scala tympani insertion

# Robotics-Assisted

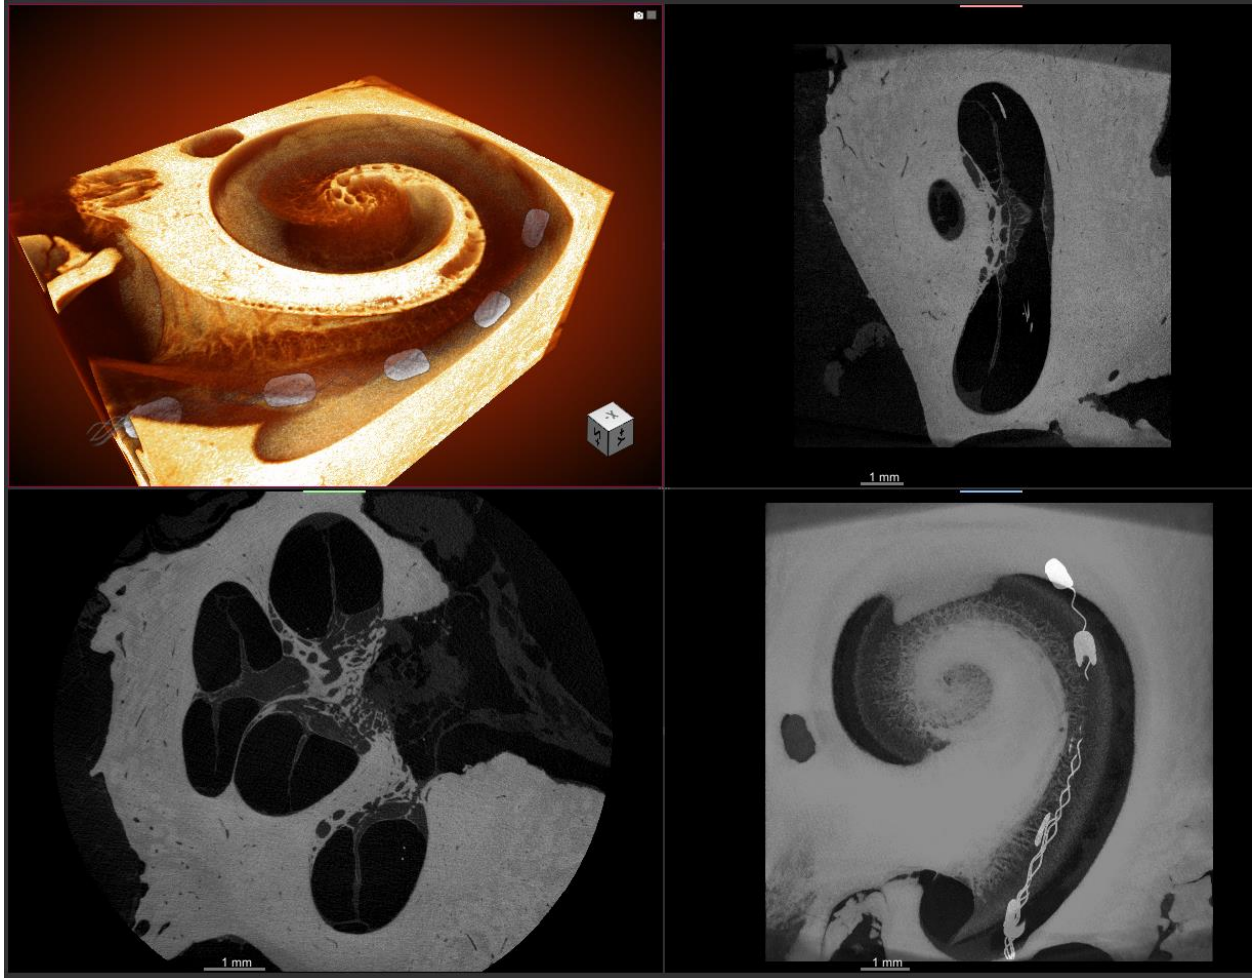

**Scala tympani insertion**

# Robotics-Assisted

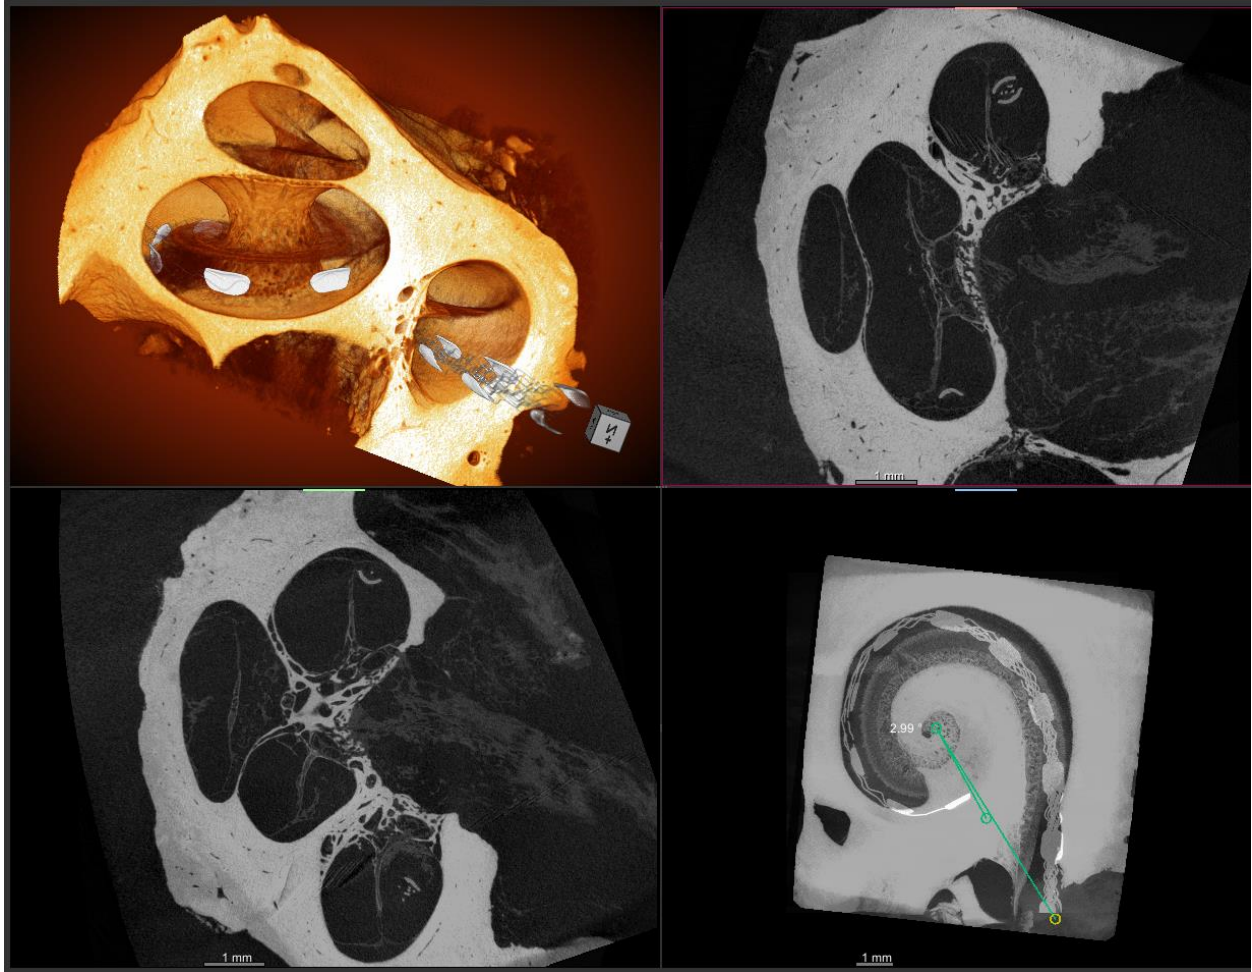

Scala tympani insertion

# Robotics-Assisted

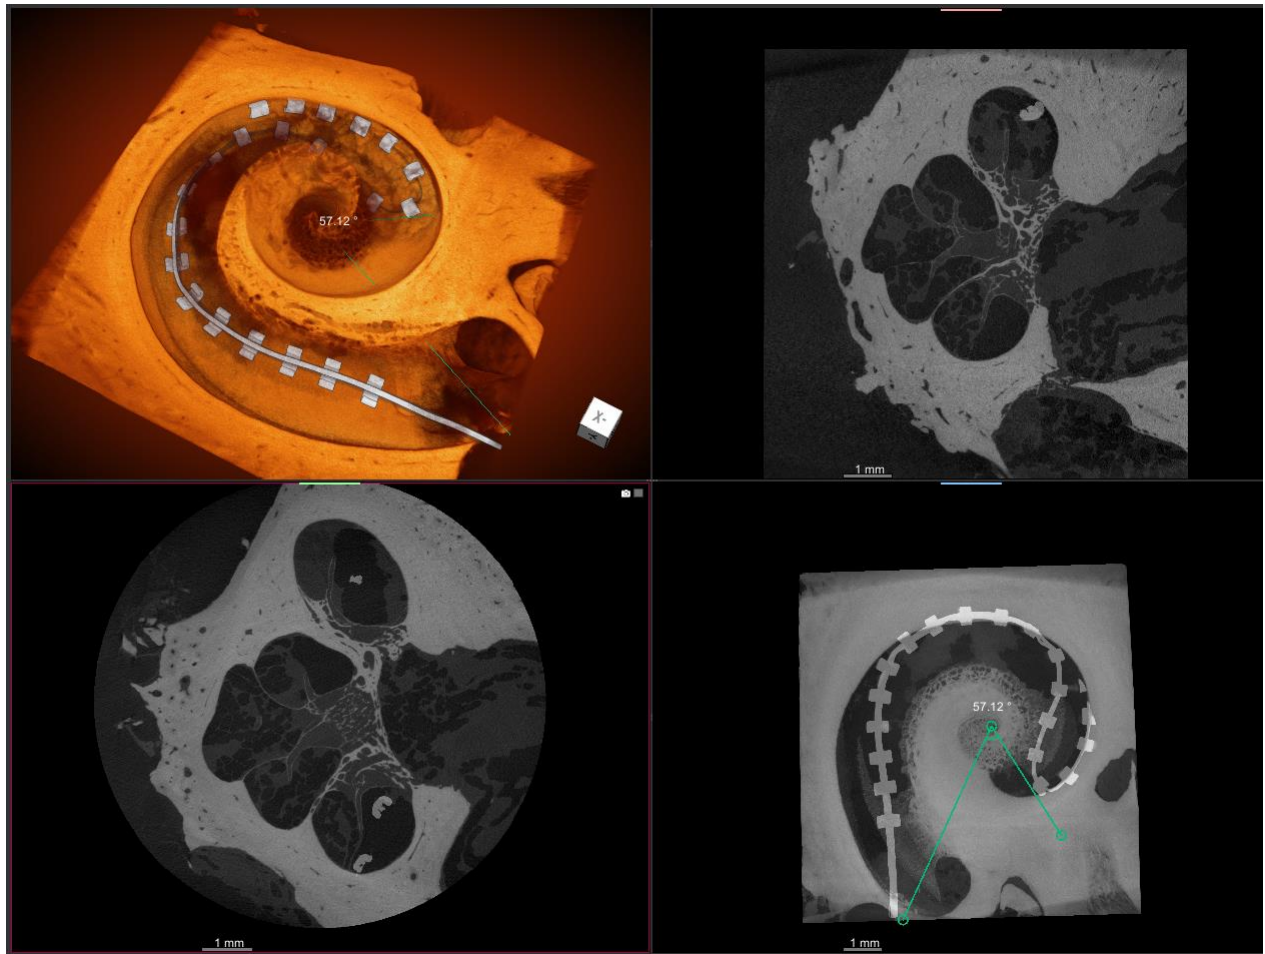

**Scala media translocation and tip fold over**

# Robotics-Assisted

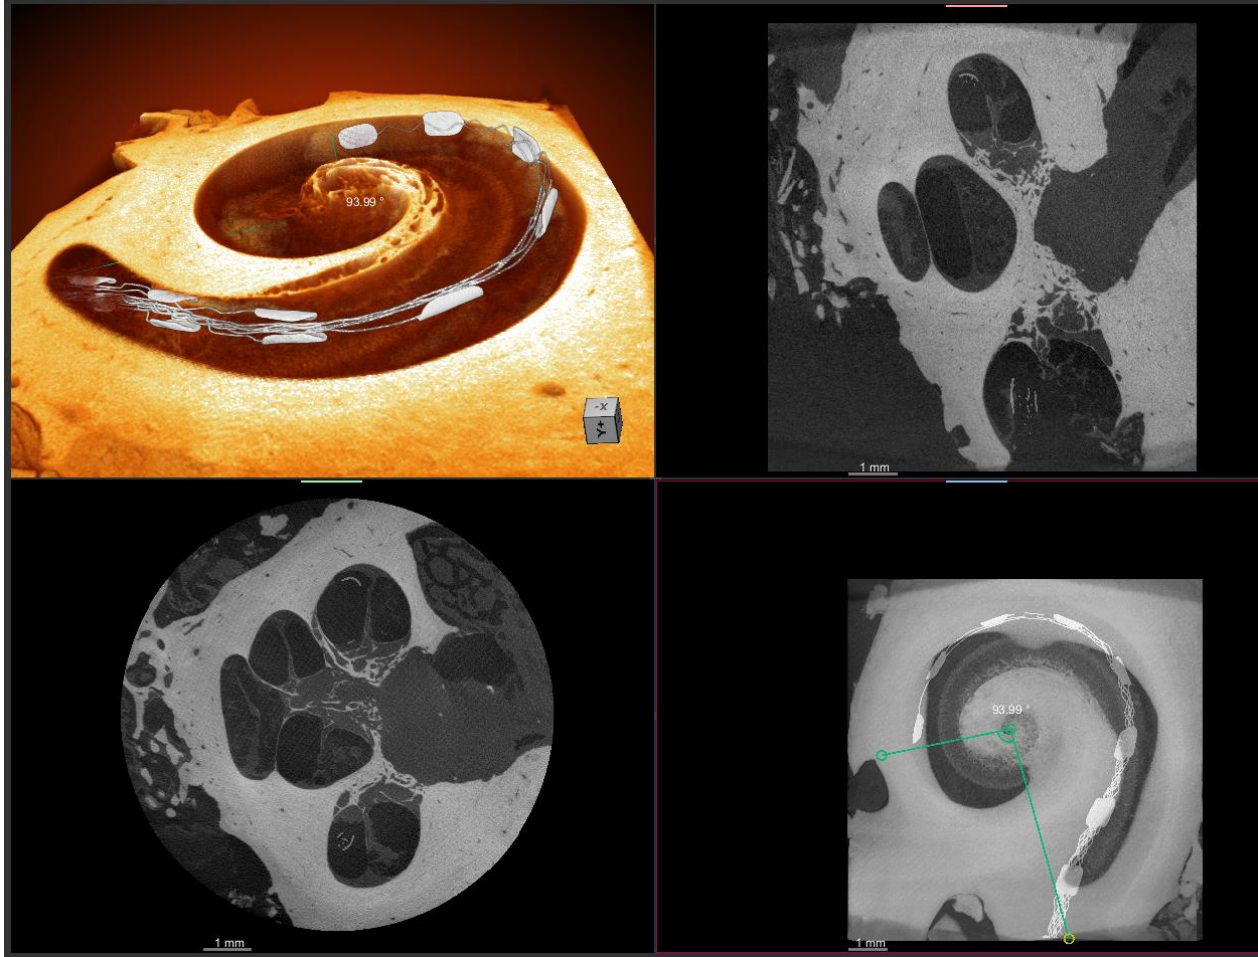

Scala vestibuli translocation



# Robotics-Assisted

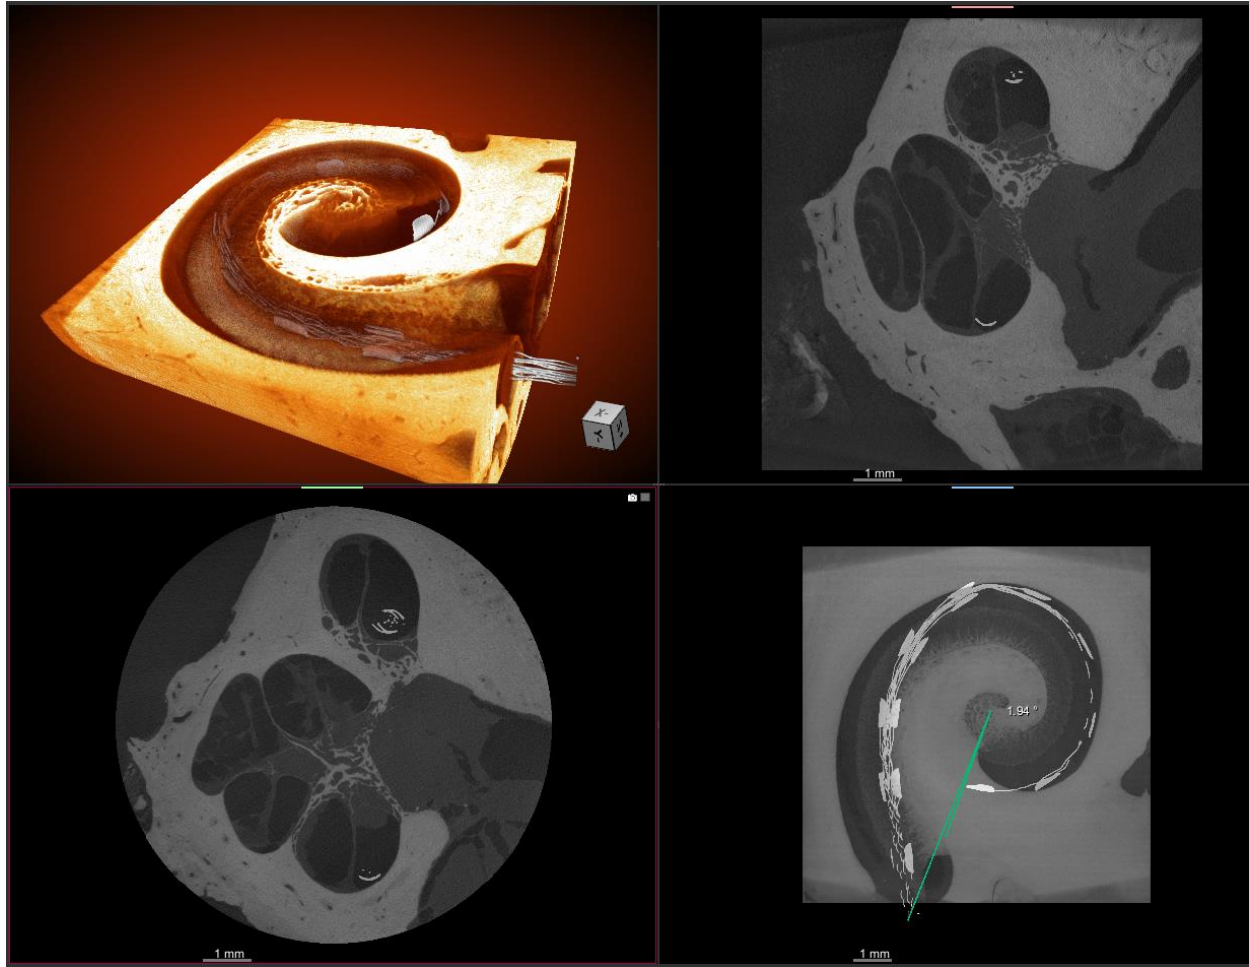

Scala tympani Insertion

# Robotics-Assisted

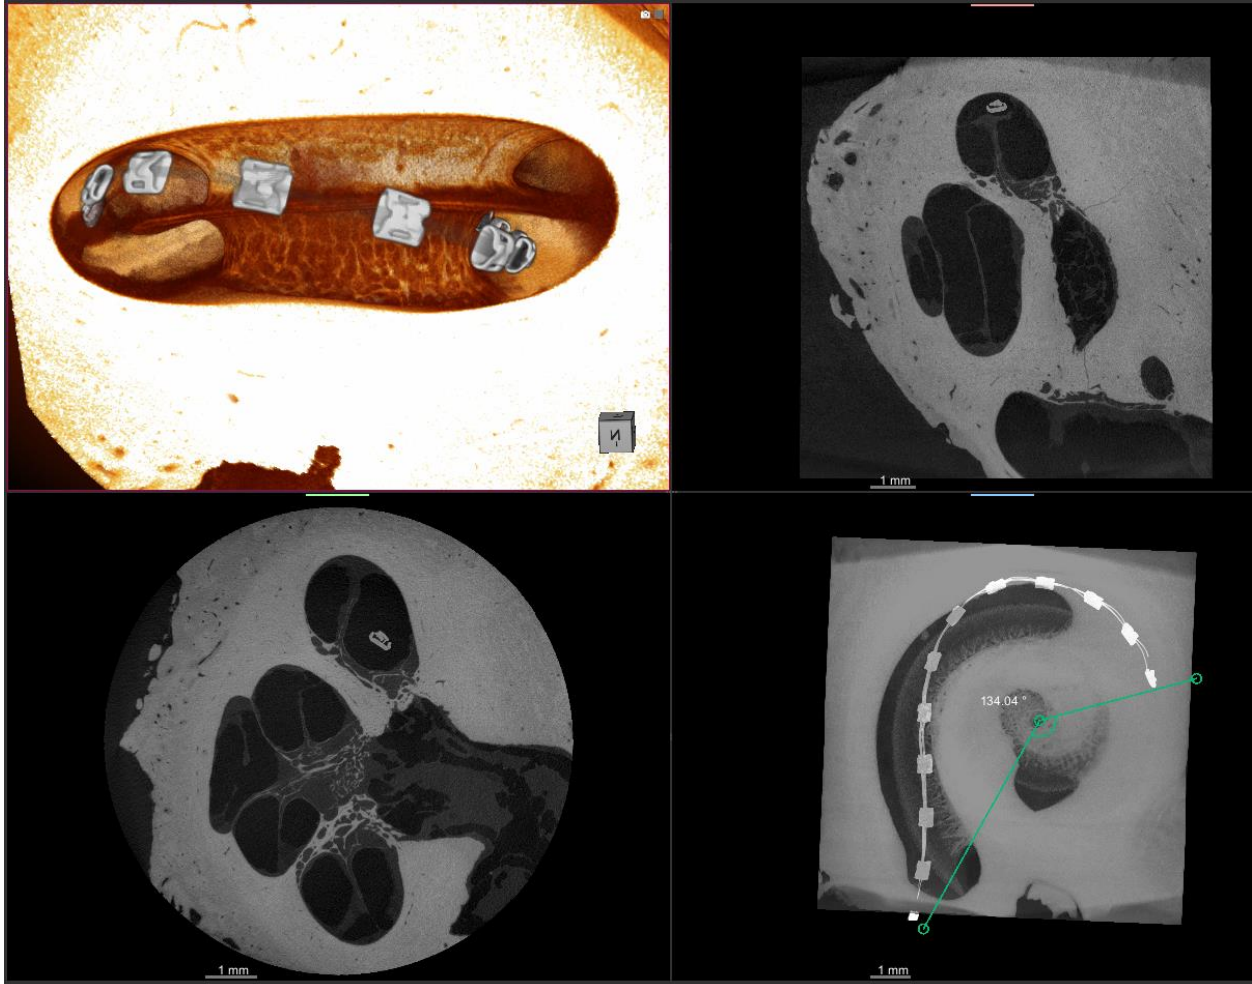

Scala media translocation

# Robotics-Assisted

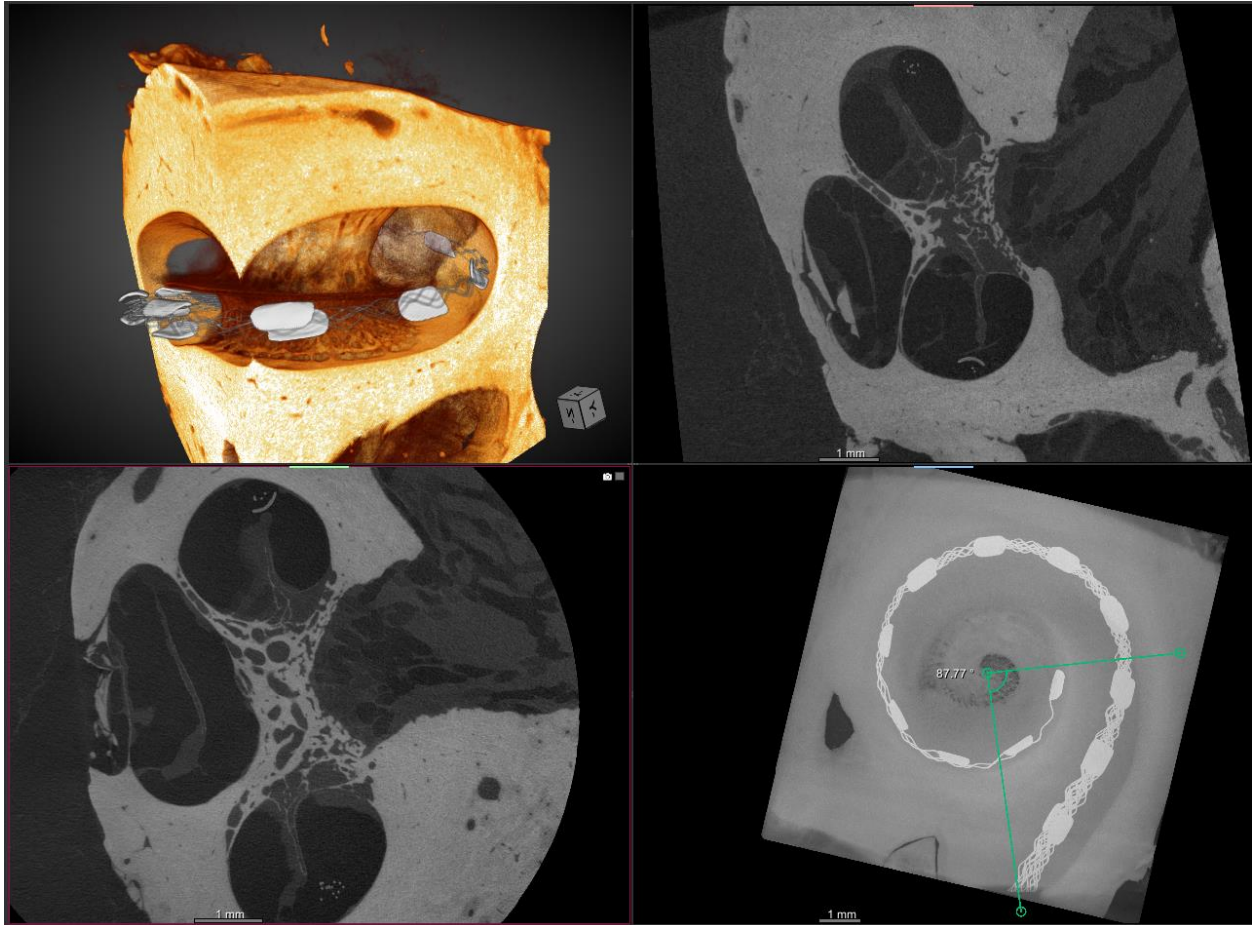

Scala media translocation

# Robotics-Assisted

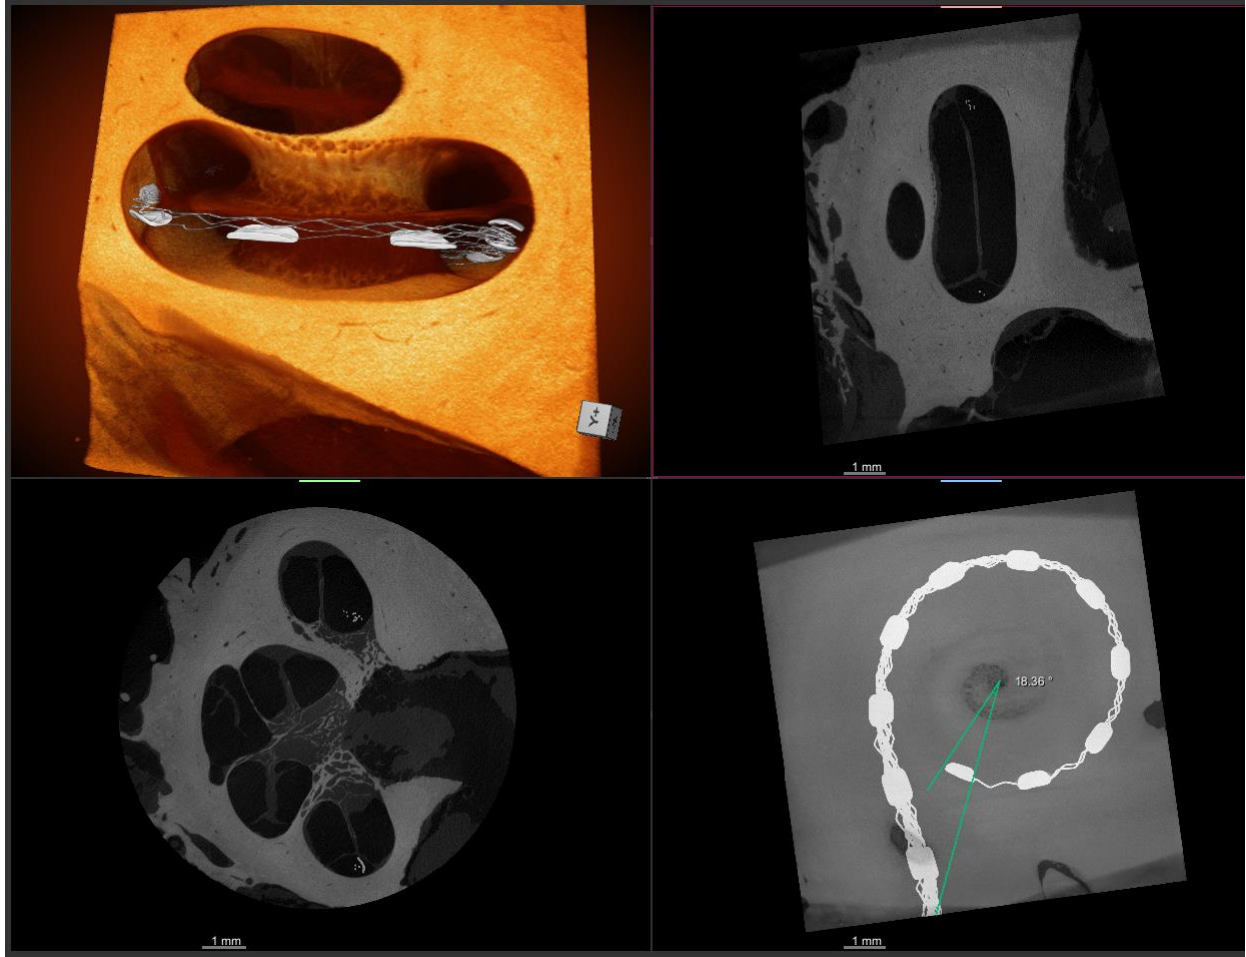

Scala media translocation

# Robotics-Assisted

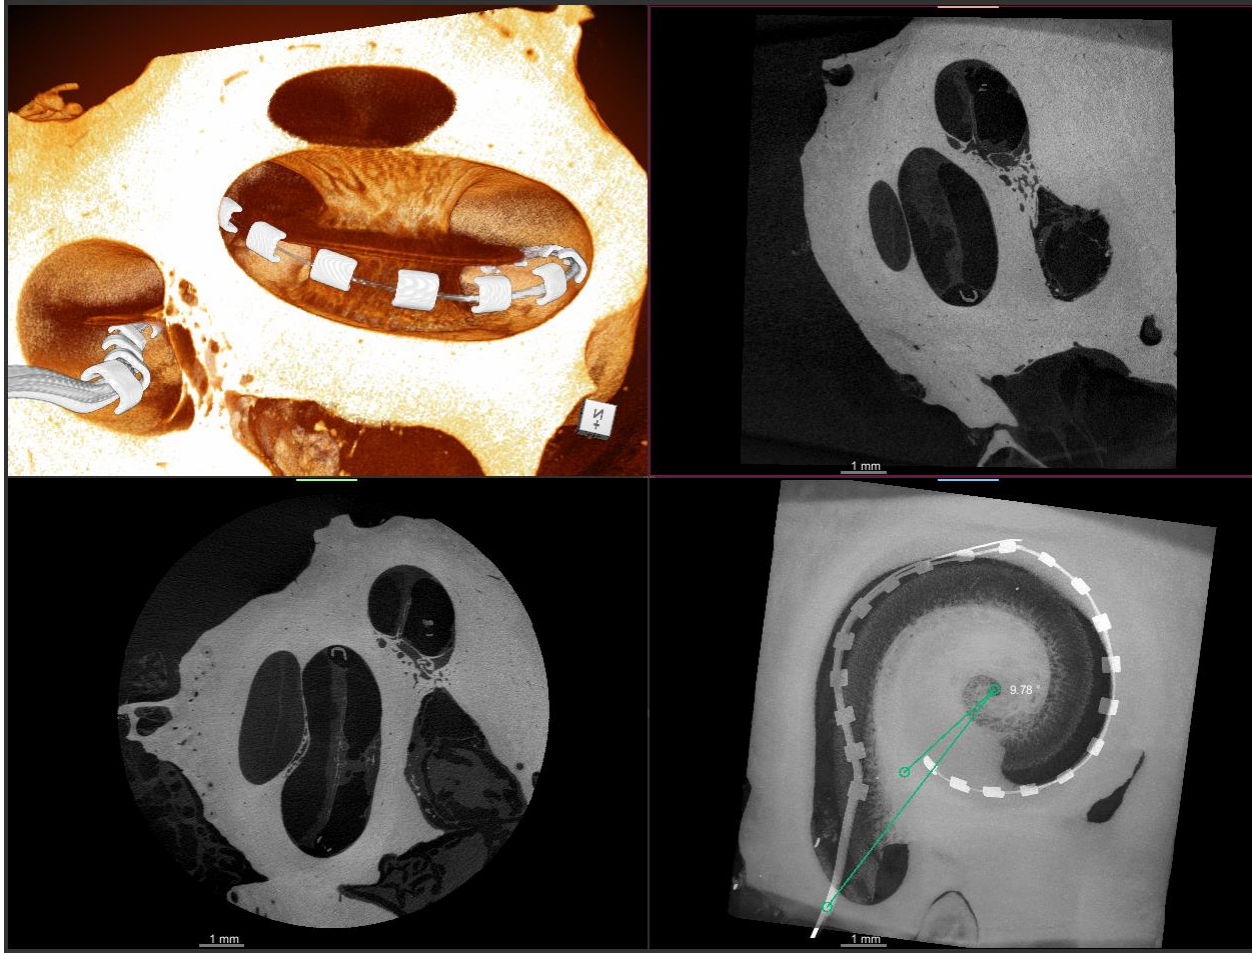

Scala media translocation

# Robotics-Assisted

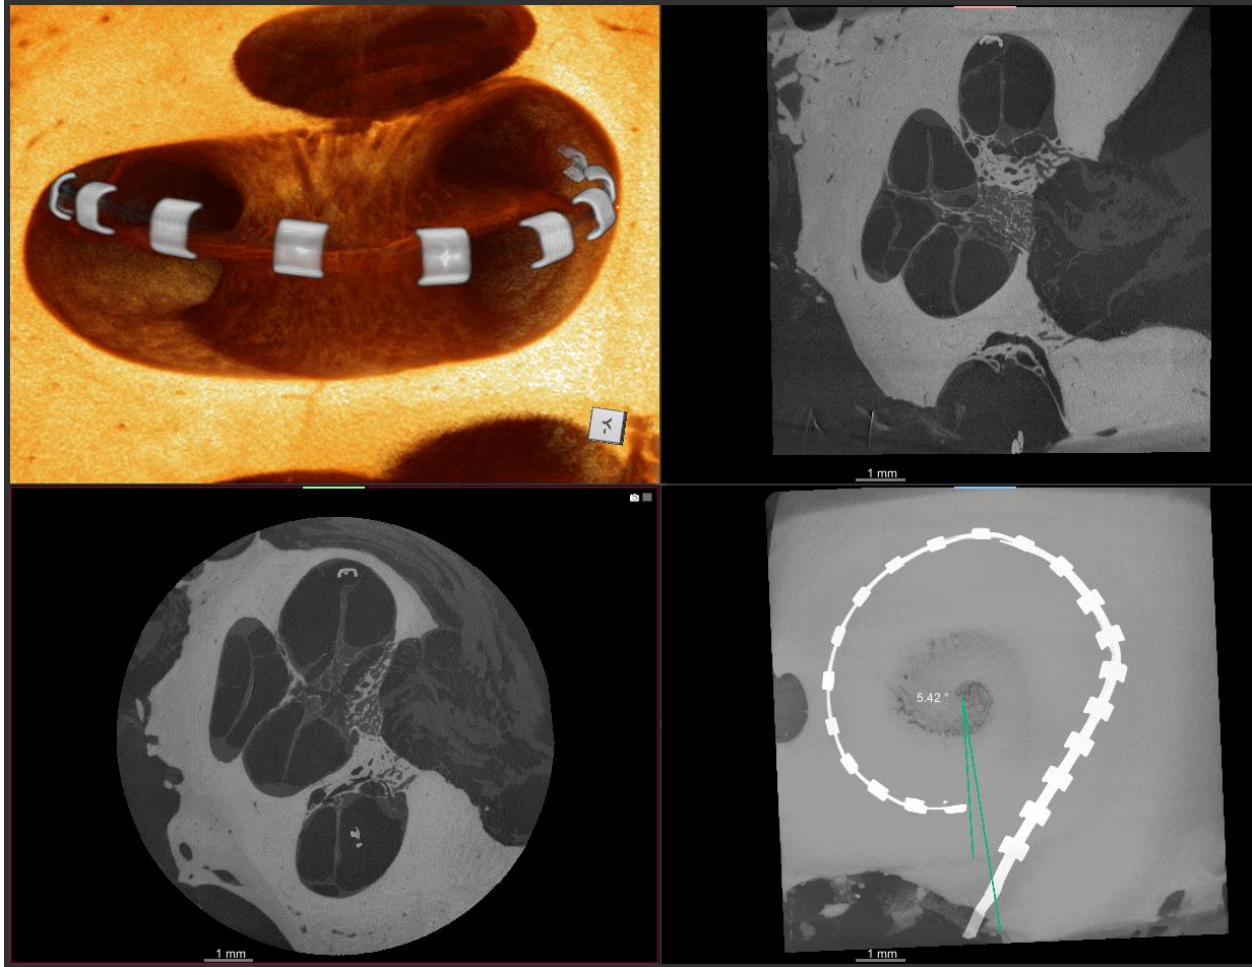

Scala media translocation
